# Supplementary material
Source: PubMed Central journal article supplement (PMC6902705)
Supplement: fj.201802702R.st1.pdf [file fj.201802702R.st1.pdf]

**Supplementary table 1 - Results of GO annotation analysis for differentially expressed genes between E18.5 transgenic (Nkx2.1-Cre) and E18.5 control lungs**

For the description of the statistical analysis see in the materials and methods section

**Upregulated in transgene**

| GO term                                                          | P-value     | Matches |
|------------------------------------------------------------------|-------------|---------|
| regulation of cell communication                                 | 8.91E-10    | 145     |
| regulation of signaling                                          | 3.40E-09    | 144     |
| tissue development                                               | 3.88E-08    | 96      |
| regulation of signal transduction                                | 2.88E-07    | 121     |
| negative regulation of cellular process                          | 3.6861E-06  | 173     |
| developmental process                                            | 1.08229E-05 | 212     |
| negative regulation of nitrogen compound metabolic process       | 3.35843E-05 | 99      |
| animal organ development                                         | 4.13292E-05 | 135     |
| multicellular organism development                               | 5.65948E-05 | 186     |
| anatomical structure development                                 | 0.00010333  | 198     |
| negative regulation of cellular metabolic process                | 0.000204992 | 102     |
| response to organic substance                                    | 0.000229543 | 120     |
| negative regulation of macromolecule metabolic process           | 0.000238732 | 106     |
| system development                                               | 0.000245075 | 167     |
| regulation of molecular function                                 | 0.000257879 | 103     |
| negative regulation of biological process                        | 0.000274753 | 182     |
| regulation of response to stimulus                               | 0.000285001 | 142     |
| cell proliferation                                               | 0.000308887 | 88      |
| negative regulation of metabolic process                         | 0.00075341  | 112     |
| transmembrane receptor protein tyrosine kinase signaling pathway | 0.000789796 | 36      |
| regulation of multicellular organismal process                   | 0.001879232 | 122     |
| regulation of primary metabolic process                          | 0.002244979 | 177     |
| positive regulation of biological process                        | 0.00246477  | 200     |
| regulation of cell proliferation                                 | 0.002791757 | 74      |
| regulation of catalytic activity                                 | 0.002794698 | 79      |
| intracellular signal transduction                                | 0.003790052 | 103     |
| multicellular organismal process                                 | 0.004184216 | 252     |
| regulation of cellular protein metabolic process                 | 0.005121921 | 99      |
| response to chemical                                             | 0.005180724 | 145     |
| regulation of cellular metabolic process                         | 0.005721308 | 179     |
| epithelial cell proliferation                                    | 0.006884314 | 29      |
| positive regulation of cellular process                          | 0.006979719 | 180     |
| regulation of signaling receptor activity                        | 0.009438949 | 15      |

**Downregulated in transgene**

| GO term                                        | P-value  | Matches |
|------------------------------------------------|----------|---------|
| regulation of developmental process            | 0.000736 | 80      |
| regulation of multicellular organismal process | 0.002    | 89      |

|                                                           |             |     |
|-----------------------------------------------------------|-------------|-----|
| regulation of protein serine/threonine kinase activity    | 0.009730279 | 29  |
| negative regulation of cell communication                 | 0.010275246 | 62  |
| negative regulation of signaling                          | 0.011379519 | 62  |
| negative regulation of response to stimulus               | 0.012514824 | 70  |
| regulation of MAP kinase activity                         | 0.016653123 | 23  |
| regulation of kinase activity                             | 0.019677377 | 40  |
| cellular response to organic substance                    | 0.021363535 | 94  |
| regulation of MAPK cascade                                | 0.023280416 | 41  |
| MAPK cascade                                              | 0.024161615 | 43  |
| cell surface receptor signaling pathway                   | 0.026495941 | 97  |
| regulation of localization                                | 0.02724886  | 105 |
| regulation of epithelial cell proliferation               | 0.032002253 | 25  |
| regulation of nitrogen compound metabolic process         | 0.032675792 | 168 |
| regulation of protein kinase activity                     | 0.033796028 | 37  |
| regulation of cell death                                  | 0.036706664 | 72  |
| signal transduction by protein phosphorylation            | 0.042708876 | 43  |
| multicellular organismal homeostasis                      | 0.042776122 | 30  |
| negative regulation of cellular protein metabolic process | 0.042814354 | 49  |
| regulation of protein metabolic process                   | 0.046964038 | 101 |
| regulation of intracellular signal transduction           | 0.048322866 | 72  |
| response to stress                                        | 0.048614391 | 126 |
| negative regulation of protein metabolic process          | 0.048688384 | 51  |
| positive regulation of cell communication                 | 0.049514705 | 76  |
