# Supplementary material
Source: PubMed Central journal article supplement (PMC6902705)

Supplementary Figure 1

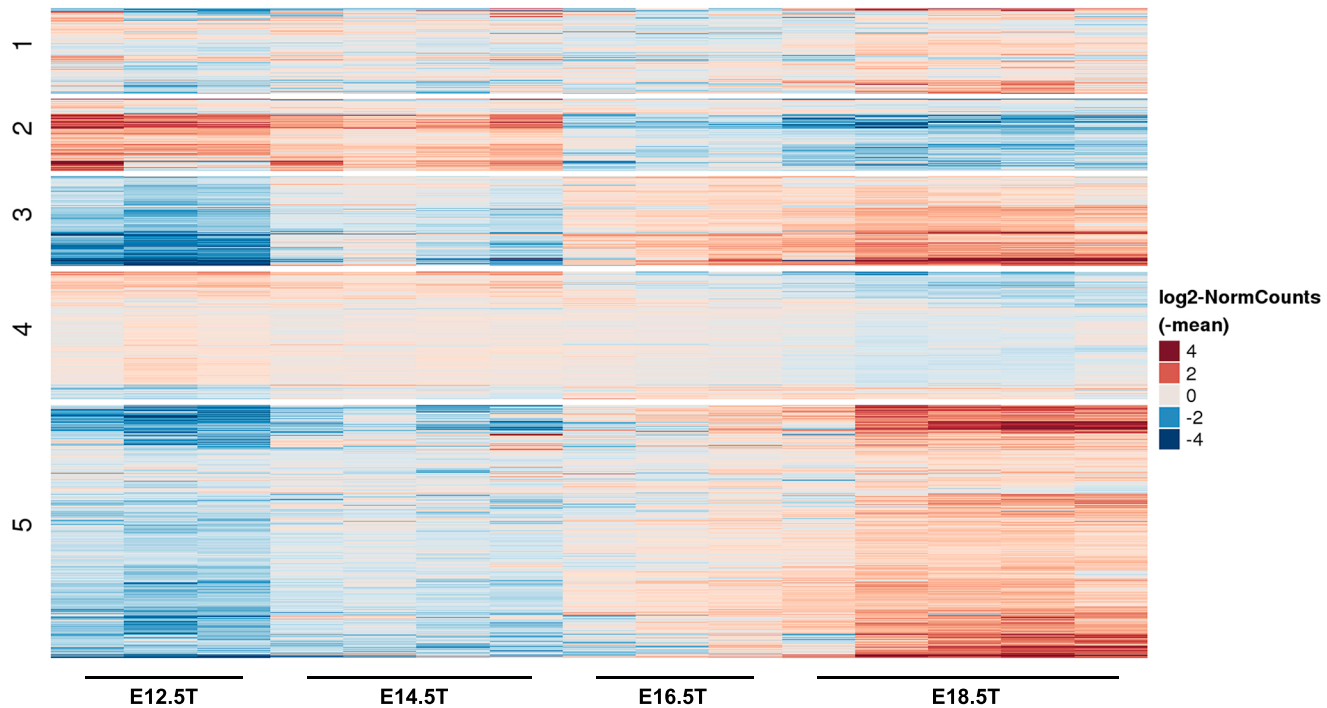

Supplement: fj.201802702R.sf1.pdf [file fj.201802702R.sf1.pdf]

Supplementary Figure 2

**A**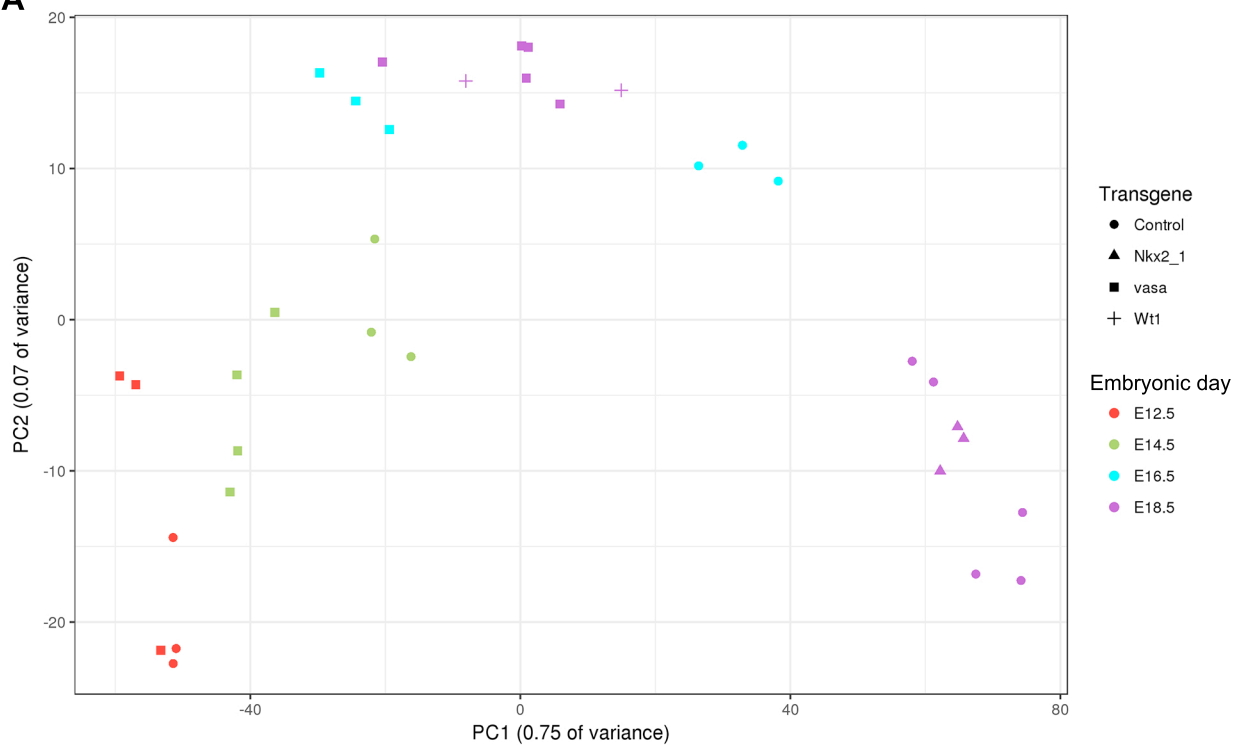**B**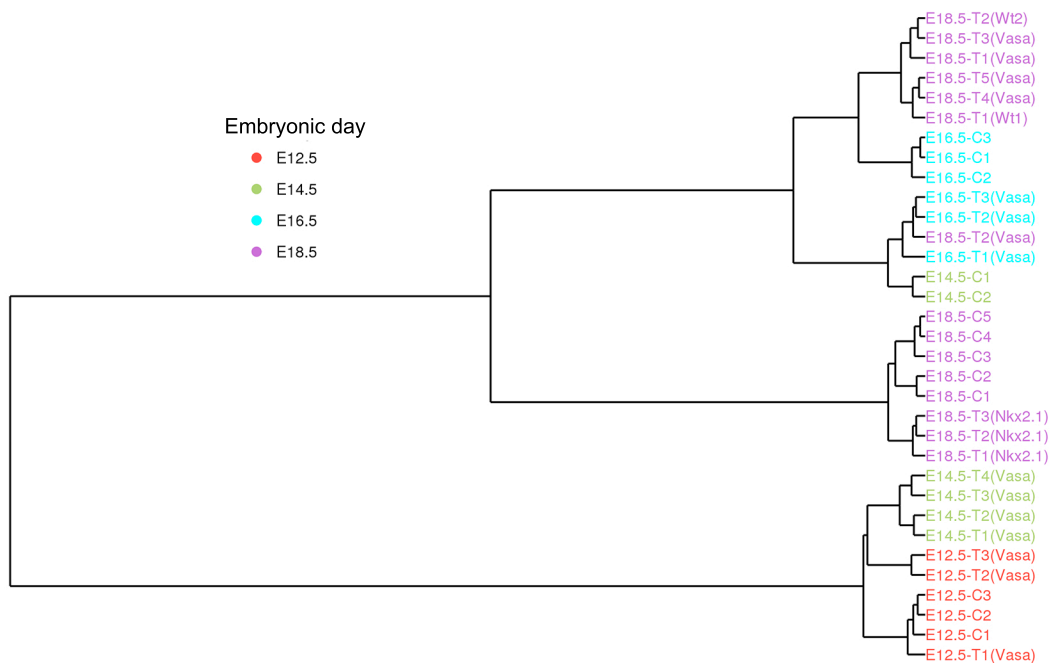

Supplement: fj.201802702R.sf2.pdf [file fj.201802702R.sf2.pdf]
